# Supplementary material for: Highly planar cross-conjugated alternating polymers with multiple conformational locks: synthesis, characterization and their field-effect properties
Source: Royal Society of Chemistry journal article supplement (doi:10.1039/c6tc02891h), 2016-01-01

## Supporting Information

### Highly planar cross-conjugated alternating polymers with multiple conformational locks: synthesis, characterization and their field-effect properties

Weifeng Zhang,<sup>a†</sup> Zupan Mao,<sup>a†</sup> Naihang Zheng,<sup>a</sup> Jiabin Zou,<sup>b</sup> Liping Wang,<sup>\*b</sup> Congyuan Wei,<sup>a</sup> Jianyao Huang,<sup>a</sup> Dong Gao<sup>a</sup> and Gui Yu<sup>\*a,c</sup>

<sup>a</sup>Beijing National Laboratory for Molecular Sciences, Institute of Chemistry, Chinese Academy of Sciences, Beijing 100190, P. R. China

<sup>b</sup>School of Material Science and Engineering, University of Science and Technology Beijing, Beijing 100083, P. R. China

<sup>c</sup>University of Chinese Academy of Sciences, Beijing 100049, P. R. China

#### 1. Thermal properties of the polymers PDTO-C1 and PDTO-C3

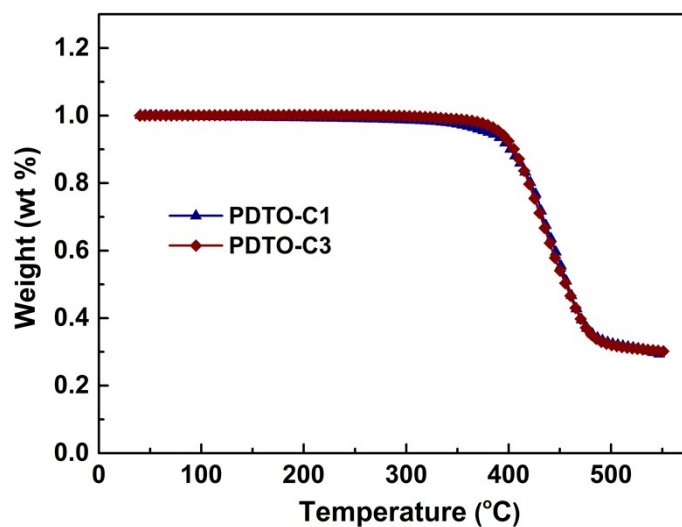

Fig. S1 TGA curves of the polymers PDTO-C1 and PDTO-C3.

## 2. The electrochemical properties of the polymers PDTO-C1 and PDTO-C3.

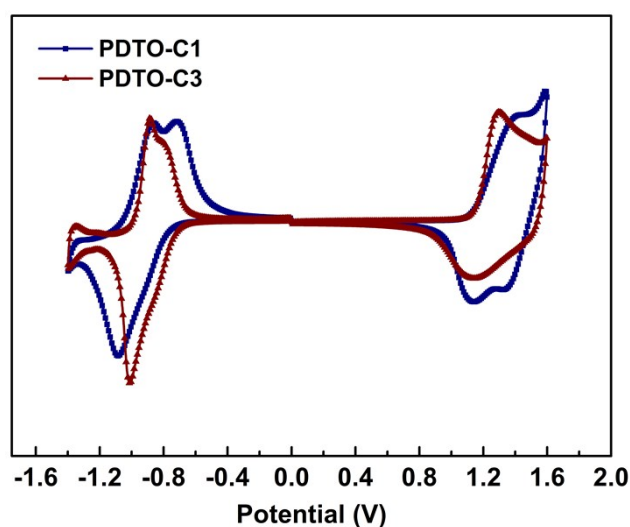

Fig. S2 CV traces of the polymers PDTO-C1 and PDTO-C3.

## 3. Typical transfer and output characteristics of the OFETs based on PDTO-C1.

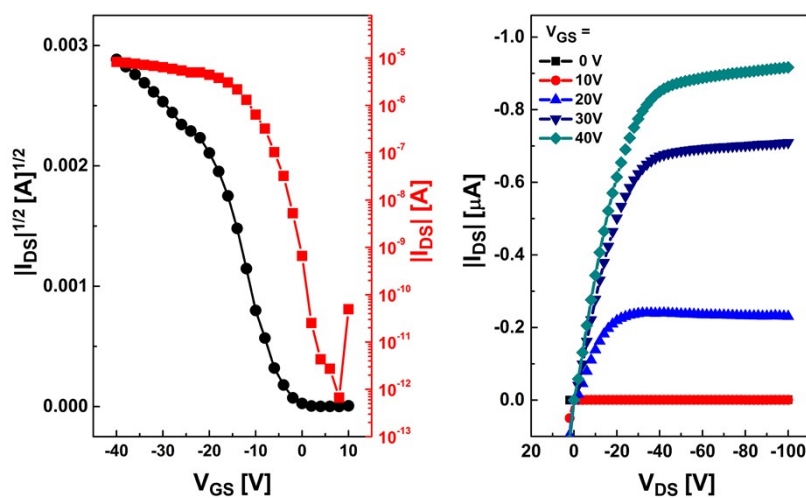

Fig. S3. The typical transfer and output characteristics of the OFETs based on PDTO-C1.

## 4. Synthetic procedures of PDPP-TC2T and PDPP-DTE.

For obtaining better comparisons, PDPP-TC2T sample was also synthesized according to reported methods (Scheme S1).<sup>1</sup> The PDPP-DTE sample was

synthesized based on previous literature.<sup>2</sup>

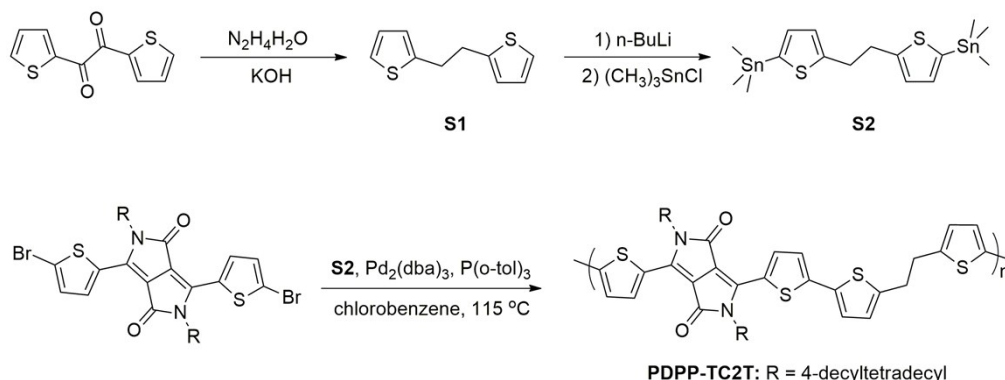

**Scheme S1** Synthetic routes of alternating polymers PDTO-TC2T.

**1,2-di(thiophen-2-yl)ethane (S1)**: An established method was adopted using 1,2-di(thiophen-2-yl)ethane-1,2-dione (1.00 g), 85% hydrazine hydrate (1.3 mL), KOH (1.8 g), and ethylene glycol (15 mL) to give the title compound as a colorless crystal (340 mg, 39 %). <sup>1</sup>H NMR (300 MHz, CD<sub>2</sub>Cl<sub>2</sub>): 7.16 (dd, *J* = 5.1 Hz, *J* = 0.9 Hz, 2H), 6.84 (dd, *J* = 5.1 Hz, *J* = 3.3 Hz, 2H), 6.73 (d, *J* = 3.0 Hz, 2H), 3.10 (s, 4H). HRMS: Calcd. for [C<sub>10</sub>H<sub>10</sub>S<sub>2</sub>]<sup>+</sup>: 194.0224; Found: 194.0221.

**1,2-bis((5-trimethylstannyl)thiophen-2-yl)ethane (S2)**: An established method was adopted using S1 (300 mg, 1.54 mmol), 2.5 M n-BuLi in hexanes (1.8 mL, 4.6 mmol), 1.0 M trimethyltin chloride in hexanes (4.8 mL, 4.8 mmol), and anhydrous tetrahydrofuran (15 mL) affording the title compound as a white solid (224 mg, 28 %). <sup>1</sup>H NMR (300 MHz, CD<sub>2</sub>Cl<sub>2</sub>): 6.93 (d, *J* = 3.3 Hz, 2H), 6.85 (d, *J* = 3.3 Hz, 2H), 3.13 (s, 4H), 0.25 (s, 18H). HRMS: Calcd. for [C<sub>16</sub>H<sub>26</sub>S<sub>2</sub>Sn<sub>2</sub>]<sup>+</sup>: 519.9514; Found: 519.9518.

**PDPP-TC2T**. An established method was adopted using S2 (0.2 mmol), dibromo-DPPs (0.2 mmol), Pd<sub>2</sub>(dba)<sub>3</sub> (6 mg) and P(*o*-tol)<sub>3</sub> (17 mg) and chlorobenzene (5.0 mL)

to afford the desired polymer martial (193 mg, 84 %). GPC:  $M_n = 14.3$  kDa,  $M_w = 40.0$  kDa, PDI = 2.34. Elemental Anal. Calcd. for  $C_{72}H_{112}N_2O_4S_4$ : C, 74.17; H, 9.68; N, 2.40; Found: C 72.79, H 9.19, N 2.52.

1. X. K. Zhao, Y. Zhao, Q. Ge, K. Butrouna, Y. Diao, K. R. Graham and J. G. Mei, *Macromolecules*, 2016, **49**, 2601–2608.

2. H. J. Chen, Y. L. Guo, G. Yu, Y. Zhao, J. Zhang, D. Gao, H. T. Liu and Y. Q. Liu, *Adv. Mater.*, 2012, **24**, 4618–4622.

## 5. Typical transfer and output characteristics of the OFETs based on PDPP-TC2T and PDPP-DTE.

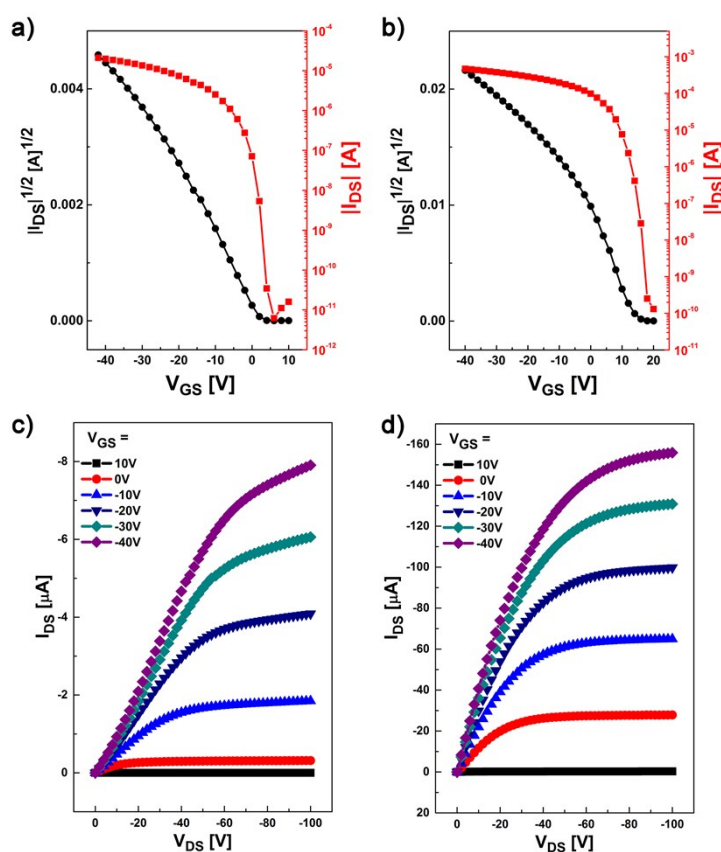

**Fig. S4** The typical transfer and output characteristics of the FET devices based on PDPP-TC2T and PDPP-DTE. (a), (c) PDPP-TC2T after annealing at 100 °C; (b), (d) PDPP-DTE after annealing at 180 °C.

## 6. X-ray crystallographic data

**Table S1.** Crystal data and structure refinement for dibromo-DTO, **3**.

|                                   |                                                                                            |
|-----------------------------------|--------------------------------------------------------------------------------------------|
| Identification code               | sa3394                                                                                     |
| Empirical formula                 | C <sub>10</sub> H <sub>4</sub> Br <sub>2</sub> O <sub>2</sub> S <sub>2</sub>               |
| Formula weight                    | 380.07                                                                                     |
| Temperature                       | 173.1500 K                                                                                 |
| Wavelength                        | 0.71073 Å                                                                                  |
| Crystal system                    | Orthorhombic                                                                               |
| Space group                       | P 21 21 21                                                                                 |
| Unit cell dimensions              | a = 5.7908(6) Å    α = 90°<br>b = 11.3325(13) Å    β = 90°<br>c = 17.3880(19) Å    γ = 90° |
| Volume                            | 1141.1(2) Å <sup>3</sup>                                                                   |
| Z                                 | 4                                                                                          |
| Density (calculated)              | 2.212 mg/m <sup>3</sup>                                                                    |
| Absorption coefficient            | 7.448 mm <sup>-1</sup>                                                                     |
| F(000)                            | 728                                                                                        |
| Crystal size                      | 0.69 × 0.18 × 0.1 mm <sup>3</sup>                                                          |
| Theta range for data collection   | 3.596 to 27.480°                                                                           |
| Index ranges                      | -7 ≤ h ≤ 7, -12 ≤ k ≤ 14, -12 ≤ l ≤ 22                                                     |
| Reflections collected             | 4648                                                                                       |
| Independent reflections           | 2548 [R(int) = 0.0264]                                                                     |
| Completeness to theta = 26.000°   | 99.3 %                                                                                     |
| Absorption correction             | Semi-empirical from equivalents                                                            |
| Max. and min. transmission        | 1.0000 and 0.3890                                                                          |
| Refinement method                 | Full-matrix least-squares on F <sup>2</sup>                                                |
| Data / restraints / parameters    | 2548 / 0 / 145                                                                             |
| Goodness-of-fit on F <sup>2</sup> | 1.069                                                                                      |
| Final R indices [I > 2σ(I)]       | R1 = 0.0277, wR2 = 0.0571                                                                  |
| R indices (all data)              | R1 = 0.0297, wR2 = 0.0582                                                                  |
| Absolute structure parameter      | 0.023(9)                                                                                   |

|                             |                                              |
|-----------------------------|----------------------------------------------|
| Extinction coefficient      | n/a                                          |
| Largest diff. peak and hole | 0.319 and $-0.555 \text{ e.}\text{\AA}^{-3}$ |

## 7. The annealing temperature-dependent mobilities of PDTO-C1 and PDTO-C3-based devices.

**Table S2.** The mobilities of PDTO-C1 and PDTO-C3-based FET devices before and after annealed at different temperatures.

| <i>Polymer</i> | $T_{an}^a$         | $\mu$                                     | $I_{on}/I_{off}$ | $V_{th}$ |
|----------------|--------------------|-------------------------------------------|------------------|----------|
|                | $^{\circ}\text{C}$ | $\text{cm}^2 \text{V}^{-1} \text{s}^{-1}$ |                  | V        |
| <b>PDTO-C1</b> | 25                 | 0.02 <sup>b</sup> (0.028) <sup>c</sup>    | $>10^4$          | 5~-5     |
|                | 60                 | 0.05 (0.070)                              | $>10^5$          | -5~-10   |
|                | 100                | 0.08 (0.095)                              | $>10^6$          | -5~-10   |
|                | 120                | 0.11 (0.14)                               | $>10^6$          | -5~-10   |
|                | 140                | 0.18 (0.22)                               | $>10^6$          | -5~-10   |
|                | 160                | 0.13 (0.16)                               | $>10^6$          | -5~-10   |
| <b>PDTO-C3</b> | 25                 | 0.08 (0.10)                               | $>10^4$          | -5~-10   |
|                | 60                 | 0.21 (0.24)                               | $>10^5$          | 0~-10    |
|                | 100                | 0.28 (0.40)                               | $>10^6$          | 0~-10    |
|                | 120                | 0.36 (0.54)                               | $>10^6$          | 0~-10    |
|                | 140                | 0.31 (0.43)                               | $>10^6$          | 0~-10    |

<sup>a</sup>Annealing temperature. <sup>b</sup>Average mobility. <sup>c</sup>The highest mobility.

# 8. $^1\text{H}$ NMR and $^{13}\text{C}$ NMR spectra

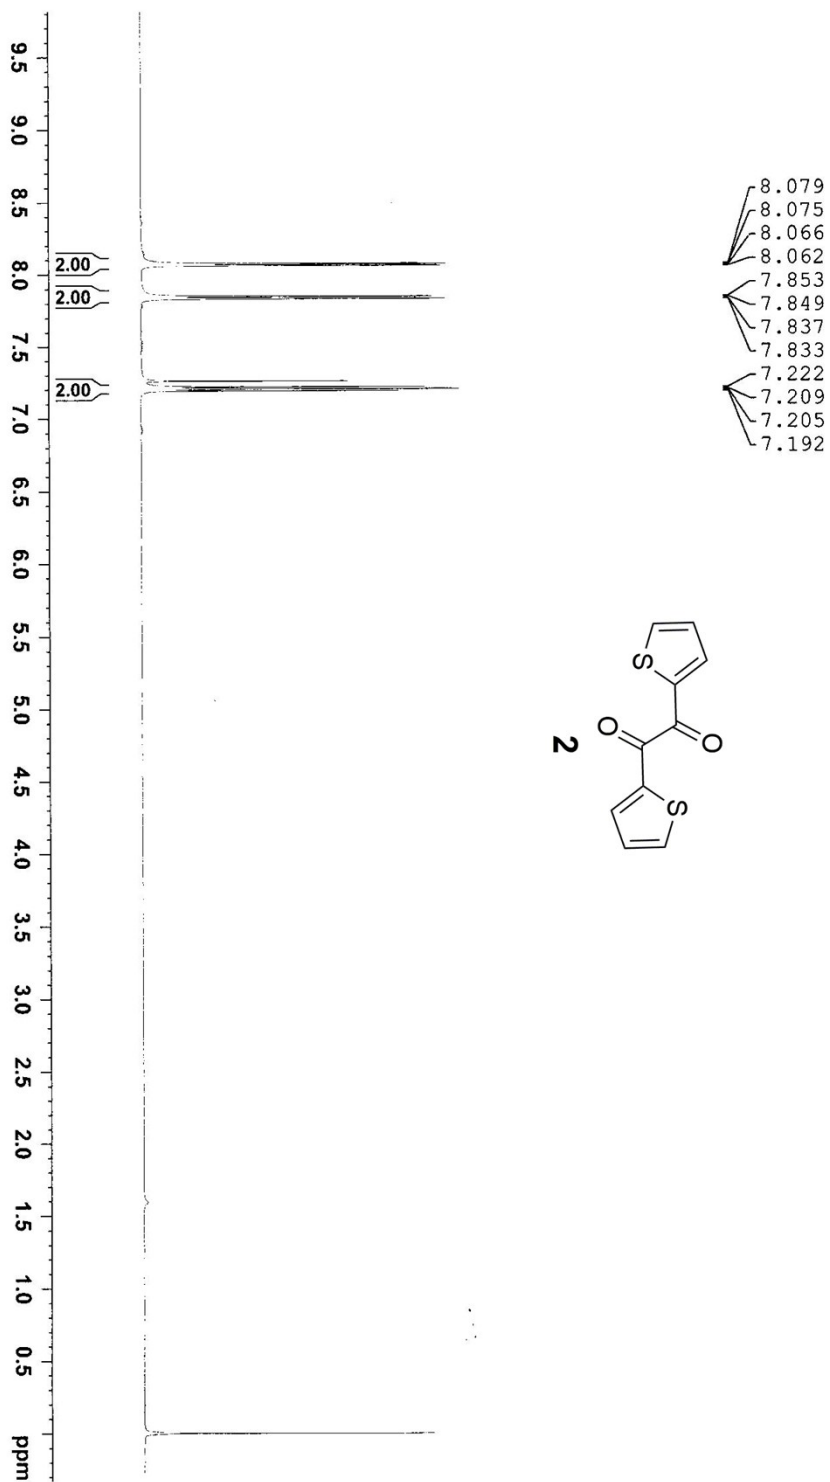





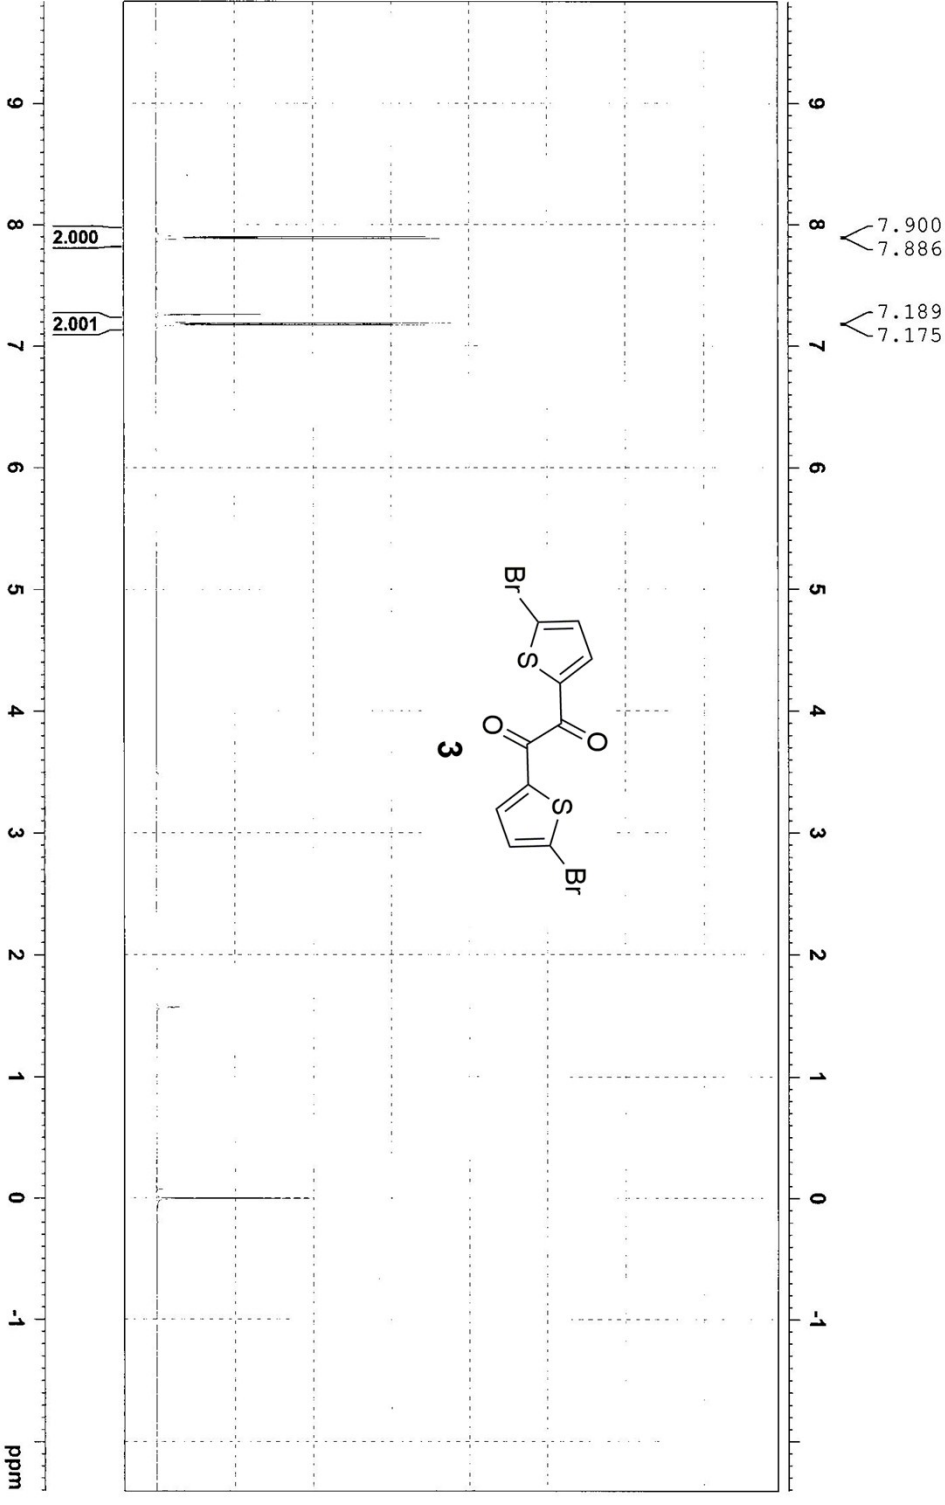

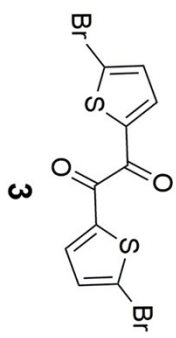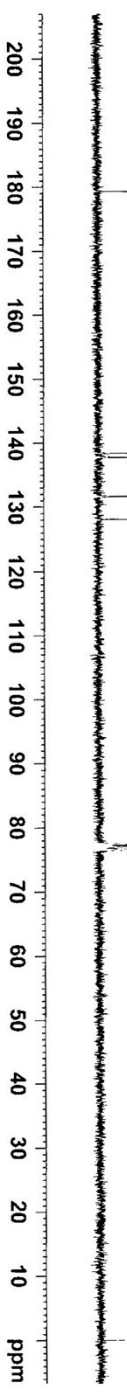

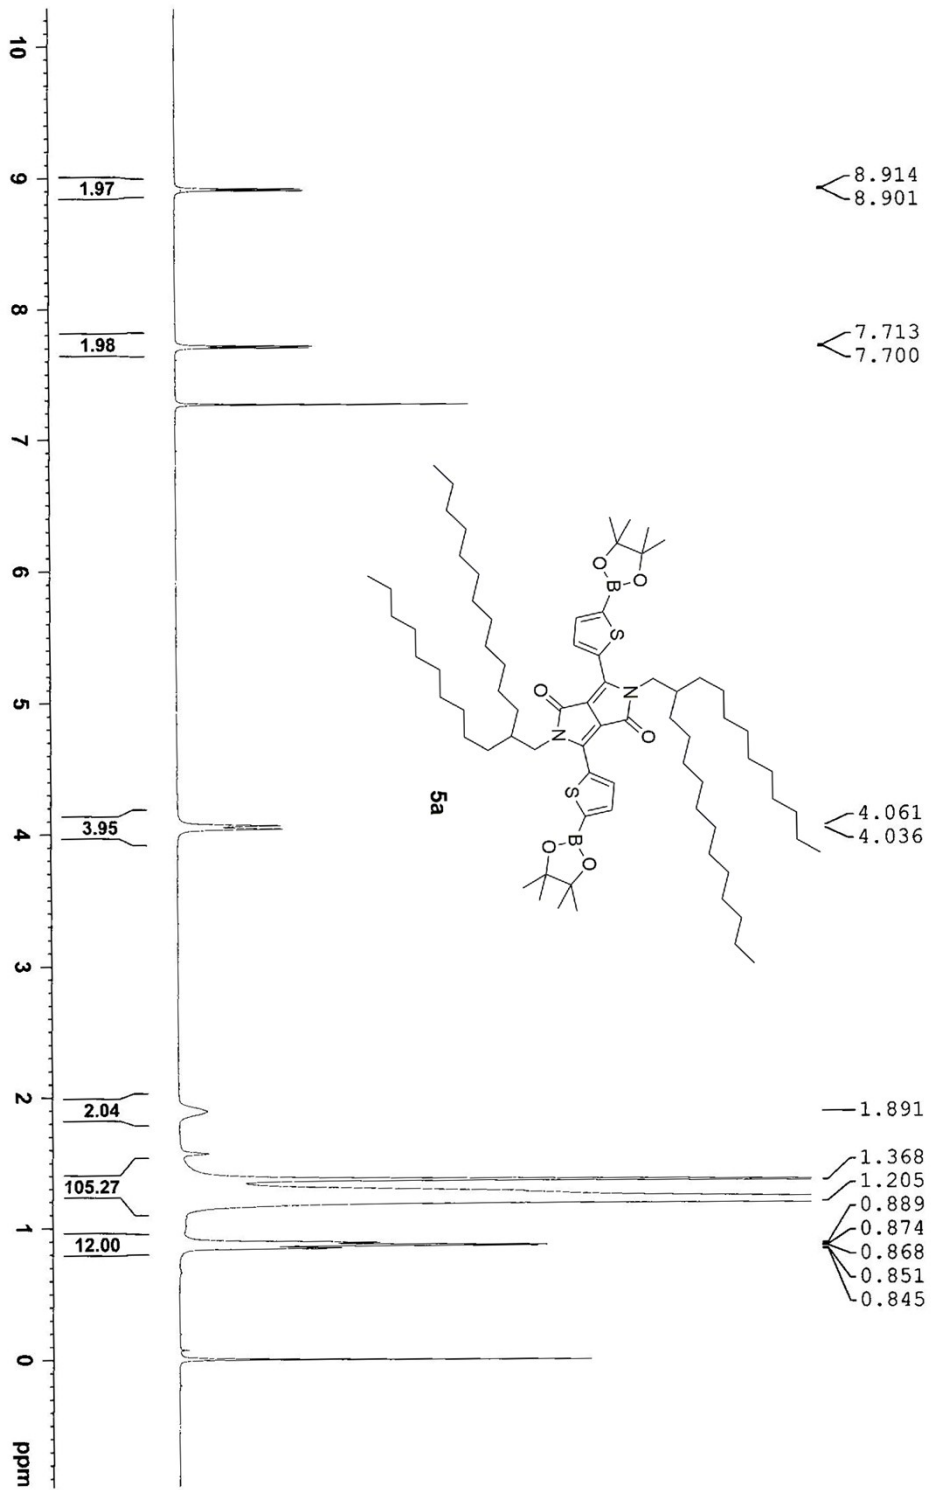

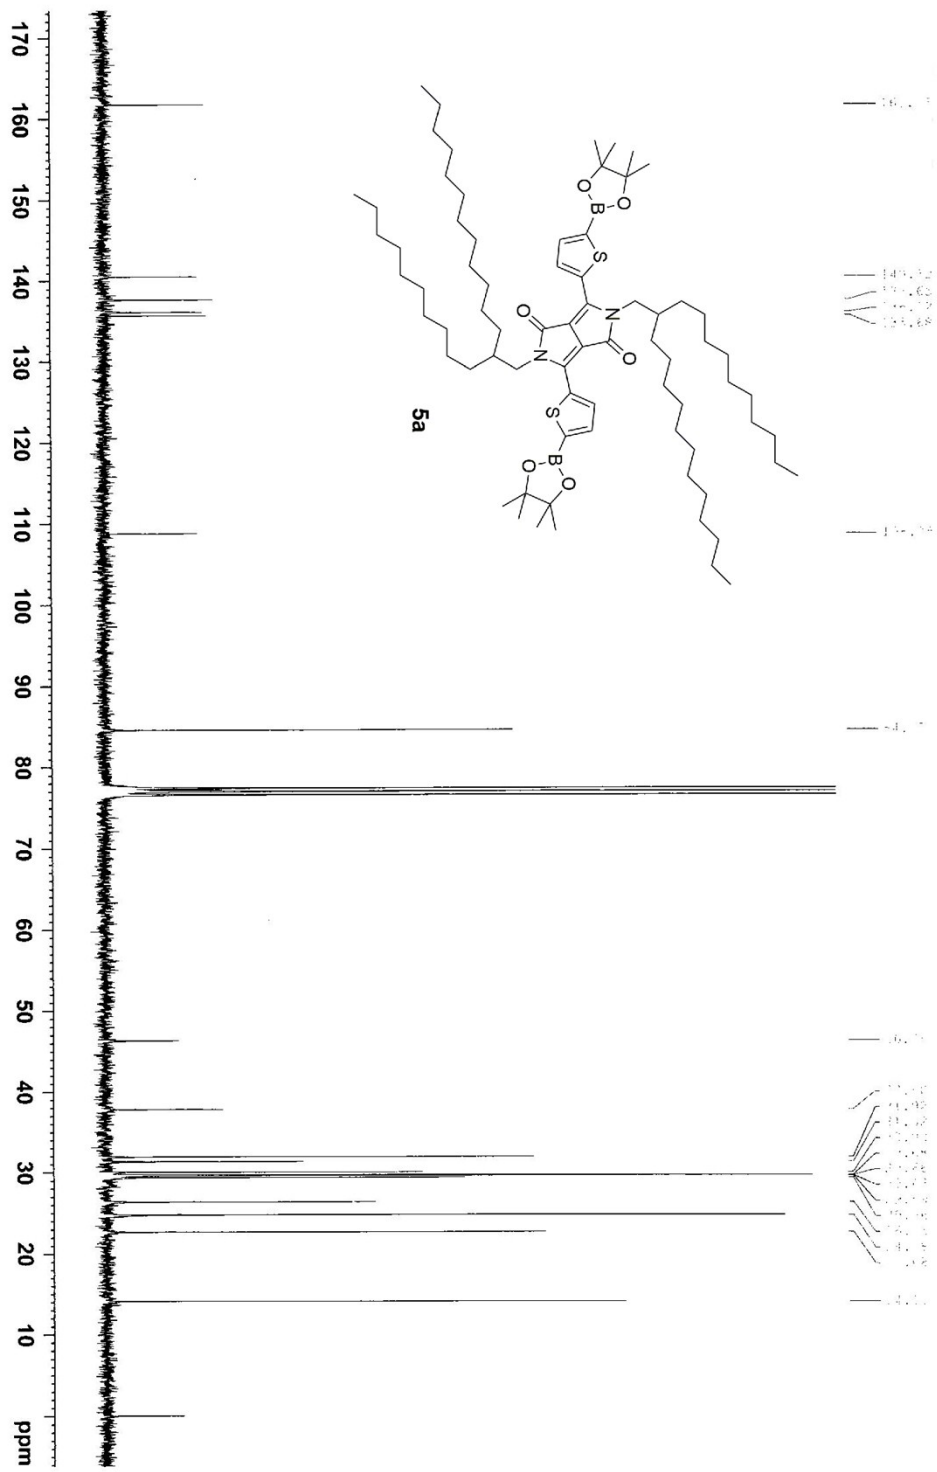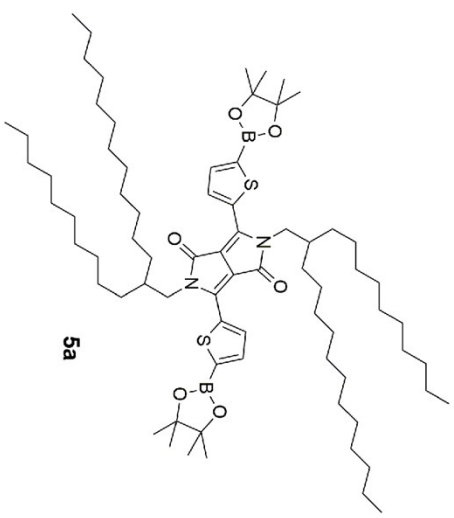

DPP-B320

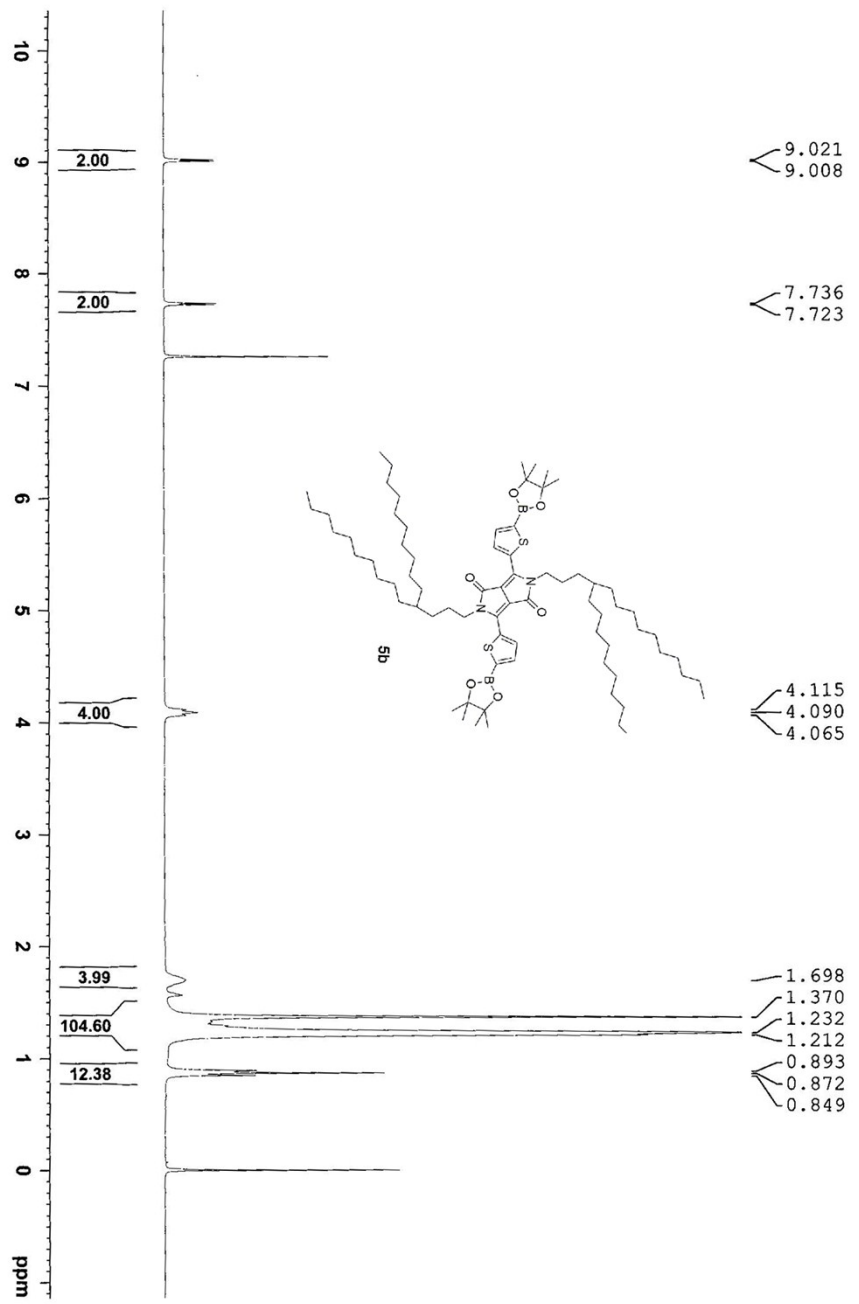

DPP-B320

17.1  
16.8  
16.5  
16.2  
15.9  
15.6  
15.3  
15.0  
14.7  
14.4  
14.1  
13.8  
13.5  
13.2  
12.9  
12.6  
12.3  
12.0  
11.7  
11.4  
11.1  
10.8  
10.5  
10.2  
9.9  
9.6  
9.3  
9.0  
8.7  
8.4  
8.1  
7.8  
7.5  
7.2  
6.9  
6.6  
6.3  
6.0  
5.7  
5.4  
5.1  
4.8  
4.5  
4.2  
3.9  
3.6  
3.3  
3.0  
2.7  
2.4  
2.1  
1.8  
1.5  
1.2  
0.9  
0.6  
0.3

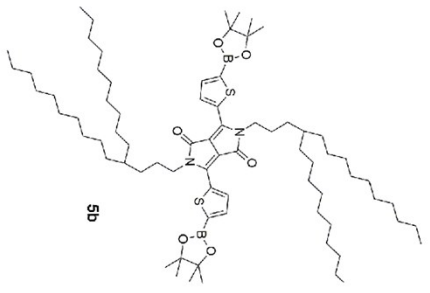

170 160 150 140 130 120 110 100 90 80 70 60 50 40 30 20 10 ppm

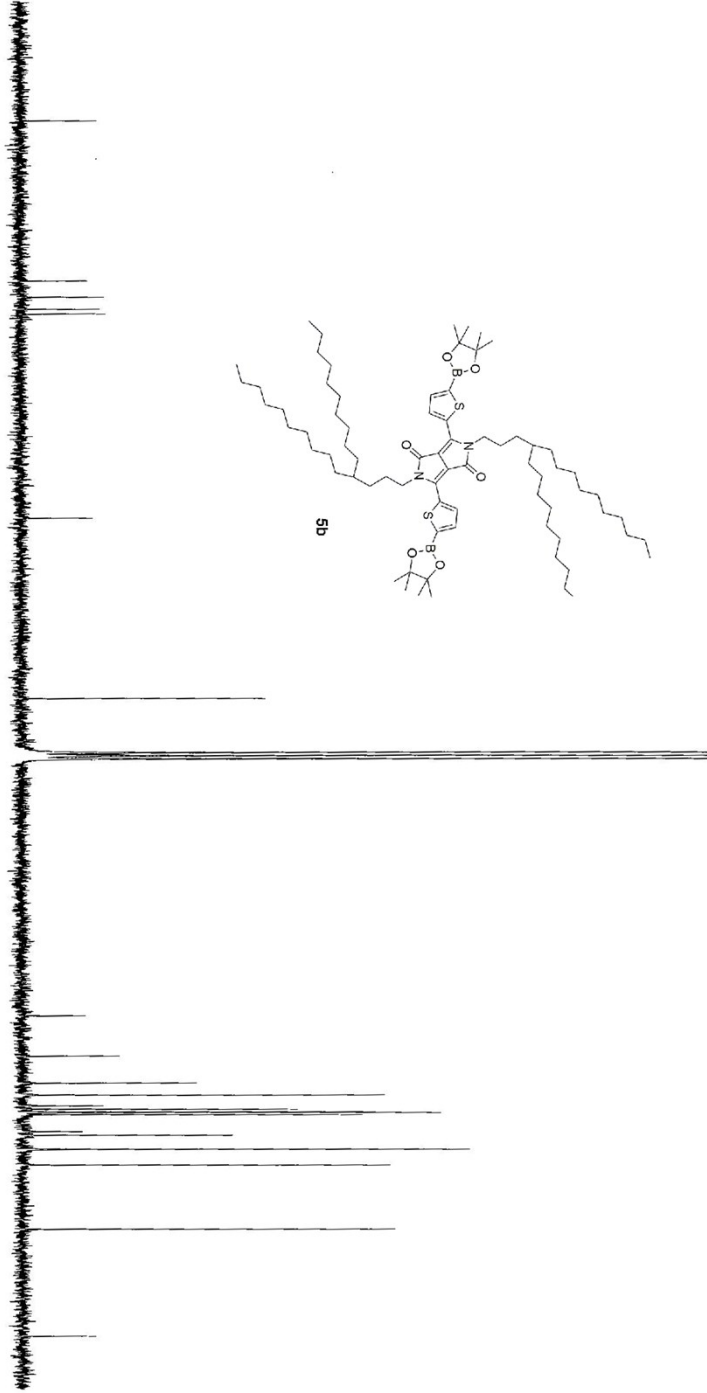

Supplement: c6tc02891h1.pdf [file c6tc02891h1.pdf]
